# Supplementary material for: NaI/CuI–II heterometallic cages interconnected by unusual linear 2-coordinate OCN-Cu(I)-NCO links: synthesis, structural, magnetostructural correlation and computational studies
Source: Royal Society of Chemistry journal article supplement (doi:10.1039/b911938h), 2009-01-01
Supplement: b911938h.pdf [file b911938h.pdf]

**Na<sup>I</sup>/Cu<sup>I-II</sup> Heterometallic Cages Interconnected by an Unusual Linear  
2-Coordinate OCN-Cu(I)-NCO Links: Synthesis, Structural,  
Magnetostructural Correlation and Computational Studies**

**Aurkie Ray,<sup>a</sup> Georgina M. Rosair,<sup>b</sup> Ramanan Rajeev,<sup>c</sup> Raghavan B. Sunoj,<sup>c</sup>  
Eva Rentschler,<sup>d</sup> Samiran Mitra<sup>\*a</sup>**

*<sup>a</sup>Department of Chemistry, Jadavpur University, Raja S. C. Mullick Road, Kolkata – 700  
032, India.*

*<sup>b</sup>School of Engineering and Physical Sciences, Heriot Watt University, Edinburgh,  
EH14 4AS, UK.*

*<sup>c</sup>Department of Chemistry, Indian Institute of Technology Bombay, Powai,  
Mumbai 400076, India.*

*<sup>d</sup>Johannes Gutenberg - University of Mainz, Institute of Inorganic and Analytical  
Chemistry, Duesbergweg 10-14, D-55128 Mainz.*

*\*To whom correspondence should be addressed*

*E-mail: smitra\_2002@yahoo.com*

*Tel: + 91-33-2414 6193; fax: + 91-33-2414 6414*

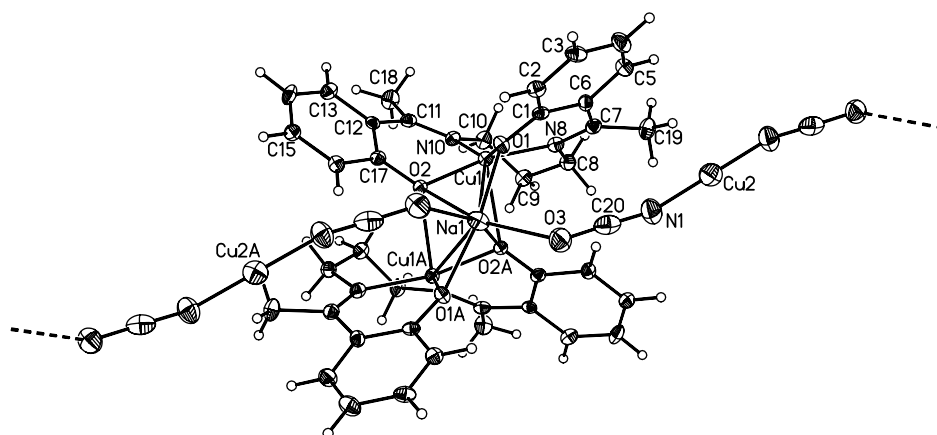

**Fig. S1:** Probability ellipsoids of **1** drawn at the 40% probability level.

The suffix A denotes symmetry code:  $-x, y, 0.5-z$

**Table S1:** The delocalization of the electrons from copper to the ligands in OCN-Cu-NCO linkage. The NBO second-order perturbative stabilization energies are obtained at the NBO/B3LYP//B3LYP/6-31G\*,LANL2DZ level of theory.

| Acceptor orbitals        | Delocalization energies<br>(kcal/mol) |
|--------------------------|---------------------------------------|
| $\pi^*$ 2px (N(1)-C20)   | 3.07                                  |
| $\pi^*$ 2py (N(1)-C20)   | 3.07                                  |
| $\pi^*$ 2px (N(1)#2-C20) | 3.07                                  |
| $\pi^*$ 2py (N(1)#2-C20) | 3.07                                  |

Total electronic energies (in a.u) and Cartesian coordinates of geometries optimized at the B3LYP/6-31G\*,LANL2DZ level of theory

| 2                  |           |           |           |
|--------------------|-----------|-----------|-----------|
| Et = -1192.2015312 |           |           |           |
| 6                  | -2.995608 | -0.280066 | 0.429196  |
| 6                  | -2.425466 | -1.158897 | -0.562031 |
| 6                  | -3.052141 | -2.426140 | -0.766580 |
| 6                  | -4.123574 | -2.836607 | -0.004604 |
| 6                  | -4.650937 | -2.000341 | 1.001812  |
| 6                  | -4.098217 | -0.750981 | 1.193305  |
| 8                  | -1.397224 | -0.866915 | -1.295604 |
| 29                 | 0.006841  | 0.283716  | -0.680921 |
| 7                  | 1.571078  | 1.471998  | -0.161001 |
| 6                  | 1.408955  | 2.916313  | -0.348215 |
| 6                  | 0.045532  | 3.288727  | -0.924053 |
| 6                  | -1.136214 | 2.972289  | -0.006669 |
| 7                  | -1.434281 | 1.534514  | 0.028764  |
| 6                  | -2.552403 | 1.099502  | 0.559129  |
| 6                  | -3.474236 | 2.042353  | 1.320787  |
| 8                  | 1.284570  | -1.060535 | -1.186554 |
| 6                  | 2.300042  | -1.355433 | -0.436014 |
| 6                  | 3.004122  | -0.406635 | 0.392185  |
| 6                  | 4.056166  | -0.883871 | 1.220678  |
| 6                  | 4.448573  | -2.206457 | 1.228299  |
| 6                  | 3.809141  | -3.115733 | 0.359842  |
| 6                  | 2.776470  | -2.701827 | -0.452653 |
| 6                  | 2.708949  | 1.014435  | 0.308054  |
| 6                  | 3.782726  | 2.008131  | 0.720475  |
| 1                  | -2.622986 | -3.060061 | -1.536252 |
| 1                  | -4.559348 | -3.818679 | -0.174473 |
| 1                  | -5.482948 | -2.331912 | 1.615572  |
| 1                  | -4.521342 | -0.116525 | 1.964827  |
| 1                  | -4.497489 | 1.975726  | 0.940760  |
| 1                  | -3.500221 | 1.754868  | 2.378332  |
| 1                  | -3.158023 | 3.082471  | 1.277015  |
| 1                  | -2.009090 | 3.526035  | -0.374172 |
| 1                  | -0.914285 | 3.350568  | 1.003203  |

|         |           |           |           |
|---------|-----------|-----------|-----------|
| 1       | 0.050494  | 4.370004  | -1.111431 |
| 1       | -0.103149 | 2.802863  | -1.898308 |
| 1       | 1.542053  | 3.445555  | 0.608189  |
| 1       | 2.187333  | 3.295902  | -1.025873 |
| 1       | 3.994527  | 2.696174  | -0.105822 |
| 1       | 3.452432  | 2.621864  | 1.567993  |
| 1       | 4.719573  | 1.523752  | 0.983848  |
| 1       | 2.259989  | -3.390601 | -1.113940 |
| 1       | 4.124496  | -4.156576 | 0.339911  |
| 1       | 5.241134  | -2.539633 | 1.891323  |
| 1       | 4.550829  | -0.198104 | 1.901274  |
| NImag=0 |           |           |           |

|                   |           |           |           |   |           |           |           |
|-------------------|-----------|-----------|-----------|---|-----------|-----------|-----------|
| <b>3</b>          |           |           |           | 1 | -5.165323 | 2.694881  | -1.543585 |
| Et = -2384.374014 |           |           |           | 1 | -4.453773 | 5.021569  | -1.788434 |
| 6                 | -1.868258 | -0.500125 | -2.907183 | 1 | -2.485744 | 5.859766  | -0.486572 |
| 6                 | -0.884080 | -1.203638 | -2.170572 | 1 | -1.235897 | 4.312836  | 1.000975  |
| 6                 | -0.351005 | -2.419308 | -2.720369 | 1 | 0.383352  | -0.405431 | 5.744252  |
| 6                 | -0.812078 | -2.838466 | -3.984509 | 1 | 2.042064  | 1.378612  | 6.013794  |
| 6                 | -1.765207 | -2.122095 | -4.697583 | 1 | 2.994300  | 2.506644  | 3.997942  |
| 6                 | -2.301173 | -0.950405 | -4.144041 | 1 | 2.225911  | 1.829656  | 1.726373  |
| 8                 | -0.493898 | -0.742938 | -0.999581 | 1 | -0.602766 | -3.512089 | 4.121060  |
| 29                | 1.451666  | -0.538835 | -0.701548 | 1 | 0.161637  | -2.408686 | 5.264523  |
| 7                 | 3.382536  | -0.393351 | -0.176801 | 1 | -1.608097 | -2.463259 | 5.115649  |
| 6                 | 4.001440  | -1.585411 | 0.415508  | 1 | -5.809647 | -0.076379 | -1.069517 |
| 6                 | 3.006388  | -2.687885 | 0.793148  | 1 | -6.041770 | -0.012183 | 0.675721  |
| 6                 | 2.403793  | -3.477145 | -0.376241 | 1 | -6.176702 | 1.467659  | -0.269372 |
| 7                 | 1.454397  | -2.675812 | -1.140159 | 1 | -4.499332 | -1.858205 | -0.364037 |
| 6                 | 0.647751  | -3.226889 | -1.989404 | 1 | -4.720522 | -1.529893 | 1.353612  |
| 6                 | 0.693382  | -4.725618 | -2.250809 | 1 | -2.152044 | -2.672796 | 0.136216  |
| 29                | -1.431042 | -0.036211 | 0.833472  | 1 | -3.490407 | -3.626627 | 0.776220  |
| 7                 | -3.369492 | -0.237573 | 0.358782  | 1 | -3.155417 | -2.558697 | 3.036250  |

|   |           |           |           |   |           |           |           |
|---|-----------|-----------|-----------|---|-----------|-----------|-----------|
| 6 | -3.966170 | -1.565357 | 0.551327  | 1 | -1.848817 | -3.597025 | 2.470679  |
| 6 | -2.957639 | -2.671665 | 0.879693  | 1 | 1.642836  | -5.014030 | -2.719482 |
| 6 | -2.349181 | -2.633945 | 2.287830  | 1 | 0.628274  | -5.274958 | -1.304360 |
| 7 | -1.419779 | -1.522268 | 2.445802  | 1 | -0.126098 | -5.063949 | -2.883323 |
| 6 | -0.624328 | -1.453893 | 3.463821  | 1 | -2.252146 | 0.416218  | -2.470507 |
| 6 | -0.662806 | -2.509440 | 4.559762  | 1 | -3.046134 | -0.380522 | -4.694304 |
| 8 | -1.753267 | 1.857579  | 1.383280  | 1 | -2.082453 | -2.465235 | -5.677917 |
| 6 | -2.456822 | 2.595120  | 0.591963  | 1 | -0.389614 | -3.730126 | -4.438231 |
| 6 | -3.626420 | 2.131167  | -0.126474 | 1 | 5.111234  | 3.136430  | -0.224152 |
| 6 | -4.315202 | 3.044590  | -0.964693 | 1 | 4.375692  | 5.188918  | -1.328686 |
| 6 | -3.916816 | 4.359505  | -1.115810 | 1 | 2.419705  | 5.123611  | -2.891409 |
| 6 | -2.802444 | 4.823611  | -0.387554 | 1 | 1.203989  | 2.990213  | -3.263298 |
| 6 | -2.100862 | 3.973625  | 0.439235  | 1 | 1.923923  | -4.380661 | 0.028557  |
| 6 | -4.134898 | 0.770680  | 0.032167  | 1 | 3.213441  | -3.827106 | -1.038021 |
| 6 | -5.624274 | 0.534939  | -0.176637 | 1 | 2.198626  | -2.265050 | 1.402074  |
| 8 | 0.508995  | -0.008121 | 1.206793  | 1 | 3.546927  | -3.401754 | 1.429155  |
| 6 | 0.882600  | 0.315956  | 2.427472  | 1 | 4.749233  | -2.008050 | -0.275028 |
| 6 | 0.355853  | -0.354002 | 3.584482  | 1 | 4.545992  | -1.298201 | 1.325689  |
| 6 | 0.802175  | 0.058196  | 4.855957  | 1 | 5.787873  | 0.597472  | 0.944476  |
| 6 | 1.735477  | 1.074774  | 5.017208  | 1 | 6.056081  | -0.326972 | -0.531414 |
| 6 | 2.265194  | 1.707978  | 3.883598  | 1 | 6.155790  | 1.430618  | -0.581009 |
| 6 | 1.845881  | 1.337524  | 2.615954  |   |           |           |           |
| 8 | 1.744830  | 0.752807  | -2.198336 |   |           |           |           |
| 6 | 2.434481  | 1.814902  | -1.954449 |   |           |           |           |
| 6 | 2.064966  | 3.037009  | -2.603536 |   |           |           |           |
| 6 | 2.747092  | 4.214777  | -2.390835 |   |           |           |           |
| 6 | 3.854768  | 4.255480  | -1.519555 |   |           |           |           |
| 6 | 4.267426  | 3.087727  | -0.906327 |   |           |           |           |
| 6 | 3.600499  | 1.849820  | -1.094481 |   |           |           |           |
| 6 | 4.127308  | 0.643184  | -0.461153 |   |           |           |           |
| 6 | 5.614993  | 0.595979  | -0.139737 |   |           |           |           |

NImag=0

4

Et = -532.4774127

|    |           |           |           |
|----|-----------|-----------|-----------|
| 6  | -3.031964 | 0.008730  | 0.000022  |
| 7  | -1.838509 | -0.001884 | 0.000020  |
| 29 | 0.000021  | -0.014834 | -0.000003 |
| 7  | 1.838465  | -0.004872 | -0.000010 |
| 6  | 3.031842  | 0.008218  | -0.000005 |
| 8  | 4.239930  | 0.024190  | 0.000007  |
| 8  | -4.239875 | 0.022782  | -0.000019 |

NImag=0
